# Supplementary material
Source: HighWire-hosted journal article supplement (https://www.cmaj.ca/highwire/filestream/57784/field_highwire_adjunct_files/2/mat-online-appendix_3.pdf)
Supplement: mat-online-appendix_3.pdf [file mat-online-appendix_3.pdf]

### Appendix 3 (as supplied by the authors): Tool used to assess risk of bias\*

| Bias                                                                                                                                                                                                                                                                                                                                                                                                                                                        | Yes                                                                                                                                                                                                                                                                                                                                                                                                                                                                                              | No                                                                                                                                                                                                                                                                                                                                                                                                                                         | Unclear                                                                                                                                                                                                                                                                                                                                                                                                            |
|-------------------------------------------------------------------------------------------------------------------------------------------------------------------------------------------------------------------------------------------------------------------------------------------------------------------------------------------------------------------------------------------------------------------------------------------------------------|--------------------------------------------------------------------------------------------------------------------------------------------------------------------------------------------------------------------------------------------------------------------------------------------------------------------------------------------------------------------------------------------------------------------------------------------------------------------------------------------------|--------------------------------------------------------------------------------------------------------------------------------------------------------------------------------------------------------------------------------------------------------------------------------------------------------------------------------------------------------------------------------------------------------------------------------------------|--------------------------------------------------------------------------------------------------------------------------------------------------------------------------------------------------------------------------------------------------------------------------------------------------------------------------------------------------------------------------------------------------------------------|
| <b>Sequence generation</b>                                                                                                                                                                                                                                                                                                                                                                                                                                  | <ul style="list-style-type: none"> <li>Referring to a random number table</li> <li>Using a computer random number generator</li> <li>Coin tossing</li> <li>Shuffling cards or envelopes</li> <li>Throwing dice</li> <li>Drawing of lots</li> </ul>                                                                                                                                                                                                                                               | <ul style="list-style-type: none"> <li>Sequence generated by date of birth</li> <li>Sequence generated by date of admission</li> <li>Sequence generated by hospital number</li> <li>Allocation by judgement of the clinician</li> <li>Allocation by preference of the participant</li> <li>Allocation based on the results of a laboratory test or a series of tests</li> <li>Allocation by availability of treatment</li> </ul>           | <ul style="list-style-type: none"> <li>Insufficient information about the sequence generation process to permit judgement of 'Yes' or 'No'</li> </ul>                                                                                                                                                                                                                                                              |
| <b>Allocation concealment</b>                                                                                                                                                                                                                                                                                                                                                                                                                               | <ul style="list-style-type: none"> <li>Central allocation (including telephone, web-based, and pharmacy-controlled, randomization)</li> <li>Sequentially numbered drug containers of identical appearance;</li> <li>Sequentially numbered, opaque, sealed envelopes</li> </ul>                                                                                                                                                                                                                   | <ul style="list-style-type: none"> <li>Using an open random allocation schedule;</li> <li>Assignment envelopes were used without appropriate safeguards (e.g. if envelopes were unsealed or nonopaque or not sequentially numbered);</li> <li>Alternation or rotation;</li> <li>Date of birth;</li> <li>Case record number;</li> <li>Any other unconcealed procedure.</li> </ul>                                                           | <ul style="list-style-type: none"> <li>Insufficient information to permit judgement of 'Yes' or 'No'. This is usually the case if the method of concealment is not described or not described in sufficient detail to allow a definite judgement – for example if the use of assignment envelopes is described, but it remains unclear whether envelopes were sequentially numbered, opaque and sealed.</li> </ul> |
| <b>Blinding of assessors, patients</b>                                                                                                                                                                                                                                                                                                                                                                                                                      | <ul style="list-style-type: none"> <li>No blinding, but the review authors judge that the outcome and the outcome measurement are not likely to be influenced by lack of blinding;</li> <li>Blinding of participants and key study personnel ensured, and unlikely that the blinding could have been broken;</li> <li>Either participants or some key study personnel were not blinded, but outcome assessment was blinded and the non-blinding of others unlikely to introduce bias.</li> </ul> | <ul style="list-style-type: none"> <li>No blinding or incomplete blinding, and the outcome or outcome measurement is likely to be influenced by lack of blinding;</li> <li>Blinding of key study participants and personnel attempted, but likely that the blinding could have been broken;</li> <li>Either participants or some key study personnel were not blinded, and the non-blinding of others likely to introduce bias.</li> </ul> | <ul style="list-style-type: none"> <li>Insufficient information to permit judgement of 'Yes' or 'No';</li> <li>The study did not address this outcome.</li> </ul>                                                                                                                                                                                                                                                  |
| <b>Incomplete outcome data addressed</b>                                                                                                                                                                                                                                                                                                                                                                                                                    | <ul style="list-style-type: none"> <li>No missing outcome data;</li> <li>Reasons for missing outcome data unlikely to be related to true outcome;</li> <li>Missing outcome data balanced in numbers across intervention groups, with similar reasons for missing data across groups;</li> <li>Missing data have been imputed using appropriate methods.</li> </ul>                                                                                                                               | <ul style="list-style-type: none"> <li>Reason for missing outcome data likely to be related to true outcome, with either imbalance in numbers or reasons for missing data across intervention groups;</li> <li>Potentially inappropriate application of simple imputation.</li> </ul>                                                                                                                                                      | <ul style="list-style-type: none"> <li>Insufficient reporting of attrition/exclusions to permit judgement of 'Yes' or 'No' (e.g. number randomized not stated, no reasons for missing data provided);</li> <li>The study did not address this outcome.</li> </ul>                                                                                                                                                  |
| <b>Free of selective reporting?</b>                                                                                                                                                                                                                                                                                                                                                                                                                         | <ul style="list-style-type: none"> <li>The study protocol is available and all of the study's pre-specified (primary and secondary) outcomes that are of interest in the review have been reported in the pre-specified way;</li> <li>The study protocol is not available but it is clear that the published reports include all expected outcomes, including those that were pre-specified (convincing text of this nature may be uncommon).</li> </ul>                                         | <ul style="list-style-type: none"> <li>Not all of the study's pre-specified primary outcomes have been reported;</li> <li>One or more reported primary outcomes were not pre-specified (unless clear justification for their reporting is provided, such as an unexpected adverse effect);</li> </ul>                                                                                                                                      | <ul style="list-style-type: none"> <li>Insufficient information to permit judgement of 'Yes' or 'No'. It is likely that the majority of studies will fall into this category.</li> </ul>                                                                                                                                                                                                                           |
| <b>Free of other bias?</b>                                                                                                                                                                                                                                                                                                                                                                                                                                  | <ul style="list-style-type: none"> <li>The study appears to be free of other sources of bias.</li> </ul>                                                                                                                                                                                                                                                                                                                                                                                         | <ul style="list-style-type: none"> <li>Had a potential source of bias related to the specific study design used; or</li> <li>Stopped early due to some data-dependent process</li> <li>Had extreme baseline imbalance; or</li> <li>Has been claimed to have been fraudulent</li> </ul>                                                                                                                                                     | <ul style="list-style-type: none"> <li>Insufficient information to assess whether an important risk of bias exists; or</li> <li>Insufficient rationale or evidence that an identified problem will introduce bias.</li> </ul>                                                                                                                                                                                      |
| <p>*A judgment of 'Yes' indicates a low risk of bias, and a judgment of 'No' indicates a high risk of bias. Overall bias was rated as None, Minimal, Low, Moderate, High or Can't tell.<br/> Source: Higgins PT, Green S, editors. <i>Cochrane handbook for systematic reviews of interventions</i>. The Cochrane Collaboration; 2008.<br/> Available: <a href="http://www.cochrane-handbook.org">www.cochrane-handbook.org</a> (accessed 2008 Jan. 3).</p> |                                                                                                                                                                                                                                                                                                                                                                                                                                                                                                  |                                                                                                                                                                                                                                                                                                                                                                                                                                            |                                                                                                                                                                                                                                                                                                                                                                                                                    |
